# Supplementary material for: Hydrogenation of CO2 into aromatics over ZnZrO–Zn/HZSM-5 composite catalysts derived from ZIF-8
Source: Royal Society of Chemistry journal article supplement (doi:10.1039/d1cy01570b), 2021-12-14
Supplement: d1cy01570b1.pdf [file d1cy01570b1.pdf]

**Hydrogenation of CO<sub>2</sub> into aromatics over ZnZrO-Zn/HZSM-5 composite  
catalysts derived from ZIF-8**

Haifeng Tian<sup>a,\*</sup>, Jiapeng Jiao<sup>a</sup>, Fei Zha<sup>a,\*</sup>, Xiaojun Guo<sup>a</sup>, Xiaohua Tang<sup>a</sup>, Yue  
Chang<sup>a, b</sup> Hongshan Chen<sup>c</sup>

*<sup>a</sup> College of Chemistry & Chemical Engineering, Northwest Normal University,  
Lanzhou 730070, Gansu, China*

*<sup>b</sup> Key Laboratory of Eco-functional Polymer Materials of the Ministry of  
Education, Lanzhou 730070, Gansu, China*

*<sup>c</sup> College of Physics and Electronic Engineering, Northwest Normal University,  
Lanzhou 730070, Gansu, China*

---

\* Corresponding Author

Haifeng Tian, College of Chemistry & Chemical Engineering, Northwest Normal University,  
Lanzhou 730070, Gansu, China.

Email: thfnwnu@163.com

Fei Zha, College of Chemistry & Chemical Engineering, Northwest Normal University, Lanzhou  
730070, Gansu, China.

Email: zhafei@nwnu.edu.cn

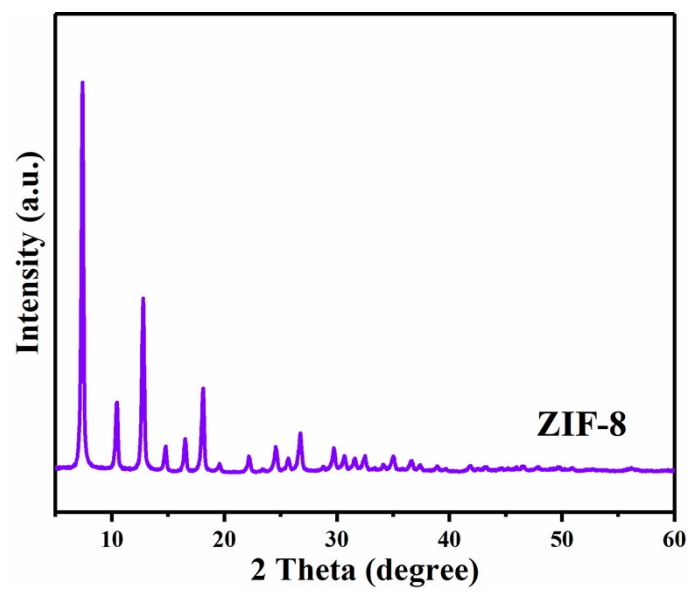

Fig. S1 XRD patterns of ZIF-8.

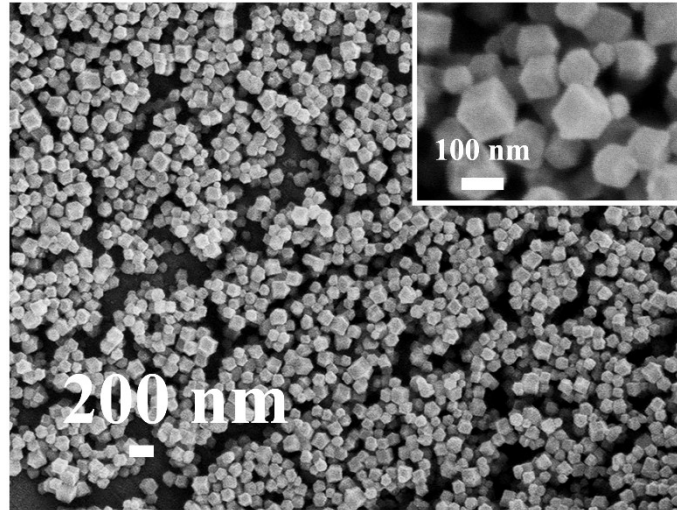

**Fig. S2** SEM images of ZIF-8.

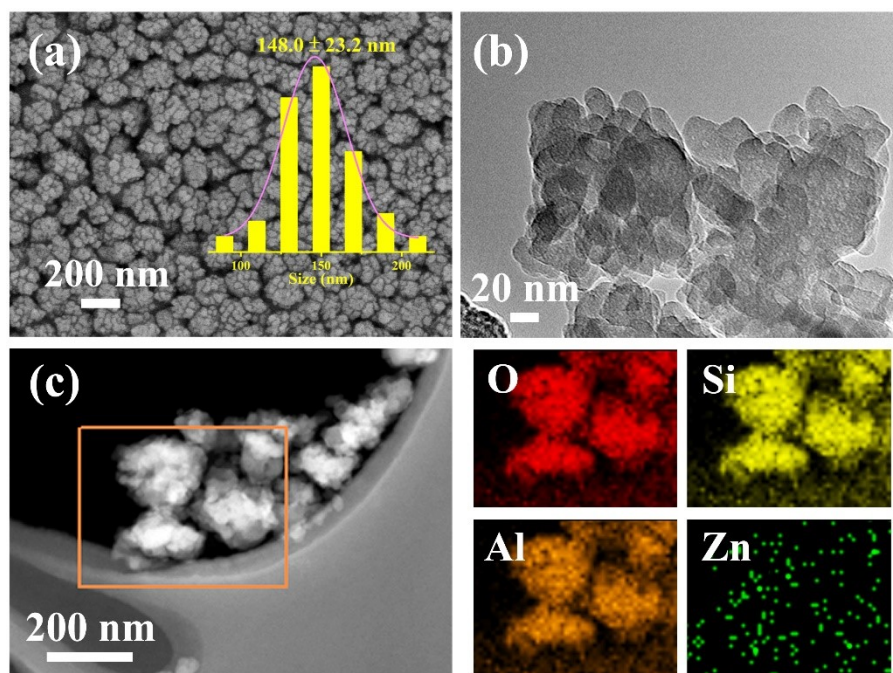

**Fig. S3** (a) SEM images and particle size calculation of Zn/Z5, (b)TEM images of Zn/Z5, (c) TEM images and corresponding EDS elemental mapping of Zn/Z5.

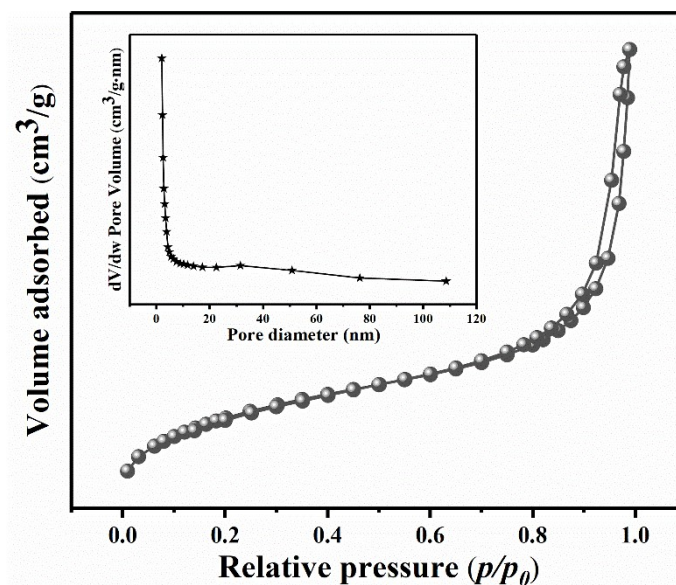

**Fig. S4** N<sub>2</sub> adsorption-desorption isotherms and pore size distribution of Zn/Z5 zeolite.

**Table S1.** The textural properties of Zn/Z5 zeolite.

| Samples | Zn                 | Surface area (m <sup>2</sup> ·g <sup>-1</sup> ) |                                 |                                | Pore volume (cm <sup>3</sup> ·g <sup>-1</sup> ) |                                 |                                |
|---------|--------------------|-------------------------------------------------|---------------------------------|--------------------------------|-------------------------------------------------|---------------------------------|--------------------------------|
|         | (wt%) <sup>a</sup> | S <sub>BET</sub> <sup>b</sup>                   | S <sub>micro</sub> <sup>c</sup> | S <sub>meso</sub> <sup>d</sup> | V <sub>total</sub> <sup>e</sup>                 | V <sub>micro</sub> <sup>f</sup> | V <sub>meso</sub> <sup>g</sup> |
| Zn/Z5   | 0.93               | 431.15                                          | 268.99                          | 162.16                         | 0.40                                            | 0.12                            | 0.28                           |

<sup>a</sup> analysed by ICP-OES, <sup>b</sup> surface area determined by BET, <sup>c</sup> micropore surface area determined by t-plot, <sup>d</sup> S<sub>meso</sub> = S<sub>BET</sub> - S<sub>micro</sub>, <sup>e</sup> total pore volume at p/p<sub>0</sub> = 0.99, <sup>f</sup> micropore volume determined by t-plot, <sup>g</sup> V<sub>meso</sub> = V<sub>BET</sub> - V<sub>micro</sub>.

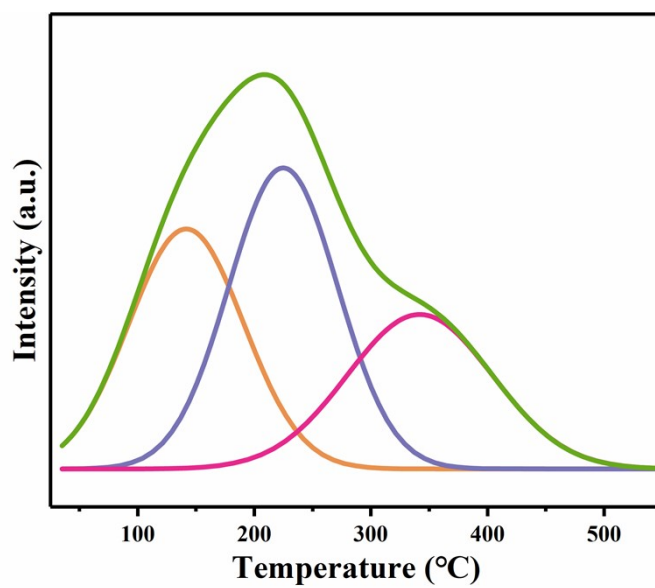

Fig. S5 NH<sub>3</sub>-TPD profile of Zn/Z5 zeolite.

Table S2. Acidic properties of Zn/Z5 zeolite determined by NH<sub>3</sub>-TPD.

| Samples | The concentration of acid sites (a.u.·g <sup>-1</sup> ) |        |        |        |
|---------|---------------------------------------------------------|--------|--------|--------|
|         | Weak                                                    | Medium | Strong | Total  |
| Zn/Z5   | 72.28                                                   | 80.46  | 79.56  | 232.30 |

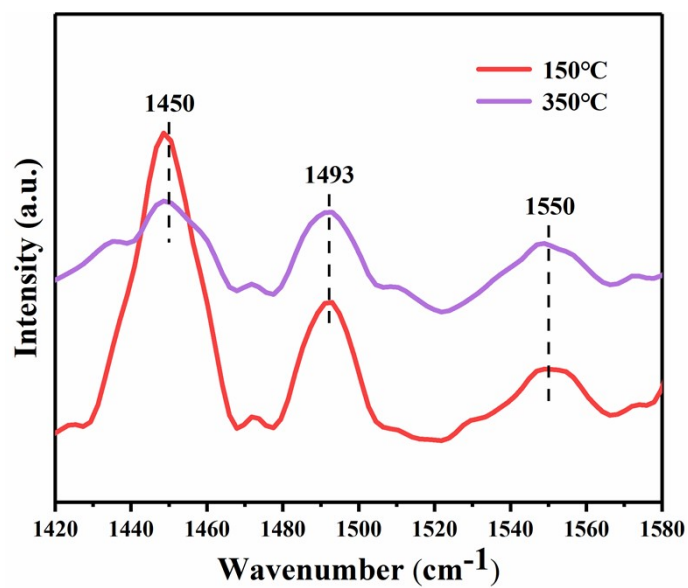

Fig. S6 Py-IR spectra of Zn/Z5 zeolite at 150°C and 350°C.

**Table S3.** Distribution of B and L acid sites on Zn/Z5 zeolite determined by Py-IR.

| Samples | Amount of B (mmol·g <sup>-1</sup> ) |       |       | Amount of L (mmol·g <sup>-1</sup> ) |       |       |
|---------|-------------------------------------|-------|-------|-------------------------------------|-------|-------|
|         | 150°C                               | 350°C | Total | 150°C                               | 350°C | Total |
| Zn/Z5   | 0.074                               | 0.067 | 0.141 | 0.355                               | 0.183 | 0.538 |

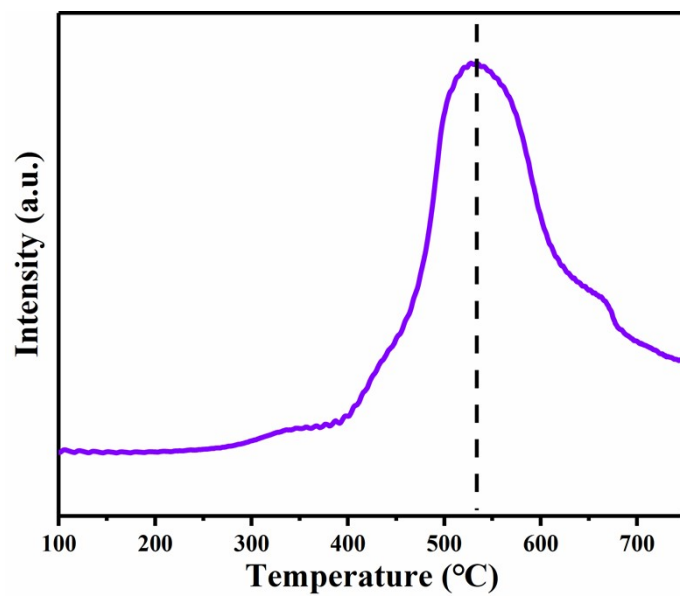

**Fig. S7** H<sub>2</sub>-TPR profile of Zn/Z5 zeolite.



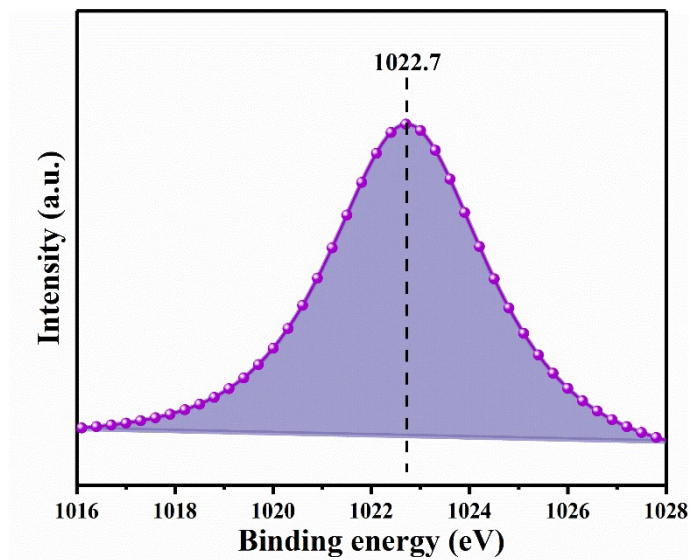

Fig. S8 XPS spectrum of Zn ( $2p_{3/2}$ ) of Zn/Z5 zeolite.

The acidic properties of Zn/Z5 zeolite were studied by NH<sub>3</sub>-TPD. As shown in Figure S5, three different NH<sub>3</sub> desorption peaks were detected in the low temperature zone (50-150°C), medium temperature zone (150-300°C) and high temperature zone (300-450°C). It shows that there are three types of acid centers in Zn/Z5 zeolite, corresponding to weak acid, medium strong acid and strong acid<sup>1,2</sup>. The concentration of different acid sites was listed in Table S2. The concentration of weak acid sites, medium strong acid sites and strong acid sites of Zn/Z5 zeolite were 72.28, 80.46 and 79.56 a.u.·g<sup>-1</sup>, respectively. The Brønsted (B) acid sites and Lewis (L) acid sites of Zn/Z5 zeolite at 150°C and 350°C were analyzed by Py-IR spectroscopy. As shown in Figure S6, three infrared absorption peaks were detected in Zn/Z5 zeolite. The absorption peak of pyridine molecules at 1450 cm<sup>-1</sup> is attributed to L acid sites, the absorption peak of pyridine molecules at 1550 cm<sup>-1</sup> is attributed to B acid sites and the absorption peak of pyridine molecules at 1493 cm<sup>-1</sup> is attributed to the combined action of B acid sites and L acid sites<sup>3,4</sup>. The detailed distribution results of B acid sites and L acid sites were listed in Table S3. The concentration of B acid sites and L acid sites of Zn/Z5 zeolite were 0.141 and 0.538 mmol·g<sup>-1</sup>, respectively. In order to deeply study the interaction between Zn and Z5 zeolite in Zn/Z5 catalyst, the presence of Zn species in Zn/Z5 catalyst was analyzed by H<sub>2</sub>-TPR and XPS, respectively. Figure S7 shows the H<sub>2</sub>-TPR profile of Zn/Z5 zeolite. It can be found that a typical reduction peak appears at about 545°C, which is attributed to the ZnOH<sup>+</sup> species produced by the strong interaction between Zn and Z5 zeolite framework<sup>5,6</sup>. This was also confirmed by the XPS spectrum of Zn 2p<sub>3/2</sub> on the Zn/Z5 zeolite surface (Figure S8), and the energy

spectrum peak attributed to the  $\text{ZnOH}^+$  species at 1022.2 eV<sup>7,8</sup>.

## Notes and references

1. Y. Bi, Y. Wang, X. Chen, Z. Yu and L. Xu, *Chin. J. Catal.*, 2014, **35**, 1740-1751.
2. X. Niu, J. Gao, Q. Miao, M. Dong, G. Wang, W. Fan, Z. Qin and J. Wang, *Micropor. Mesopor. Mater.*, 2014, **197**, 252-261.
3. K. Ji, J. Xun, P. Liu, Q. Song, J. Gao, K. Zhang and J. Li, *Chin. J. Chem. Eng.*, 2018, **26**, 1949-1953.
4. A. S. Al-Dughaiter and H. de Lasa, *Ind. Eng. Chem. Res.*, 2014, **53**, 15303-15316.
5. X. Su, K. Zhang, Y. Snatenkova, Z. Matieva, X. Bai, N. Kolesnichenko and W. Wu, *Fuel Process. Technol.*, 2020, **198**.
6. X. Su, W. Zan, X. Bai, G. Wang and W. Wu, *Catal. Sci. Technol.*, 2017, **7**, 1943-1952.
7. X. Niu, J. Gao, K. Wang, Q. Miao, M. Dong, G. Wang, W. Fan, Z. Qin and J. Wang, *Fuel Process. Technol.*, 2017, **157**, 99-107.
8. J. Chen, L. Chang, H. Kang and F. Ding, *Chin. J. Catal.*, 2001, **22**, 229-232.
